# Supplementary material
Source: publisher site journal article supplement (https://www.spandidos-publications.com/599/downloadSupplementary)
Supplement: Supplementary file 1 [file downloadSupplementary]

## Sheet: GO Patient Relapse
Table SVI. DAVID GO biological process analyses for upregulated genes in ESCC patient relapse tissue (P<0.05).
Category	Term		-log(pvalue)	PValue	Genes	List Total	Pop Hits	Pop Total	Fold Enrichment	Bonferroni	Benjamini	FDR
GOTERM_BP_FAT	GO:0033554	cellular response to stress	2.22695	0.00592997	SREBF1, NEIL3, CLPB, DUSP10, TP63, POLB, MAPK10, ATP7A, DHRS2, FANCM, RFC3, MRPS9, CASP9, TDP1, ROR2, CUL4B, APBB1, FANCC	207	566	13528	2.07835	0.999924	0.999924	9.47538
GOTERM_BP_FAT	GO:0010948	negative regulation of cell cycle process	2.20397	0.00625211	MAD2L1, TTK, APBB2, APBB1	207	25	13528	10.4564	0.999954	0.993252	9.96513
GOTERM_BP_FAT	GO:0007169	transmembrane receptor protein tyrosine kinase signaling pathway	2.13029	0.00740819	SLC2A8, SS18, FGFR1, CNKSR1, FGFR4, PDGFB, NTRK2, ROR2, PDGFC, GRB7	207	224	13528	2.91753	0.999993	0.980762	11.7023
GOTERM_BP_FAT	GO:0045740	positive regulation of DNA replication	2.06486	0.00861271	PDGFB, PDGFC, GLI2, POT1	207	28	13528	9.33609	0.999999	0.96816	13.4787
GOTERM_BP_FAT	GO:0000305	response to oxygen radical	1.93576	0.0115943	ATP7A, TXNRD2, FANCC	207	11	13528	17.8235	1	0.975714	17.7324
GOTERM_BP_FAT	GO:0007167	enzyme linked receptor protein signaling pathway	1.80319	0.015733	SLC2A8, SS18, FGFR1, CNKSR1, FGFR4, PDGFB, NTRK2, SMAD3, ROR2, PDGFC, TGFB1I1, GRB7	207	342	13528	2.29308	1	0.985197	23.3119
GOTERM_BP_FAT	GO:0015893	drug transport	1.7927	0.0161176	SLC2A8, SLC15A2, SLC47A2	207	13	13528	15.0814	1	0.975279	23.812
GOTERM_BP_FAT	GO:0001776	leukocyte homeostasis	1.76502	0.0171785	SIVA1, IKBKG, BCL2L11, FANCC	207	36	13528	7.26141	1	0.968335	25.1753
GOTERM_BP_FAT	GO:0006468	protein amino acid phosphorylation	1.58174	0.0261973	PDK2, PRKCZ, FGFR1, FGFR4, STK31, STK36, PNCK, TTK, WNK2, MAPK10, TYK2, STYK1, NTRK2, ROR2, DYRK4, STK19, IGFBP3, PIK3R4	207	667	13528	1.76364	1	0.99092	35.8742
GOTERM_BP_FAT	GO:0018205	peptidyl-lysine modification	1.56854	0.027006	ATP7A, JMJD6, HDAC9	207	17	13528	11.5328	1	0.987272	36.7598
GOTERM_BP_FAT	GO:0045786	negative regulation of cell cycle	1.45553	0.0350326	MAD2L1, SMAD3, TTK, APBB2, APBB1	207	81	13528	4.03411	1	0.994302	44.9471
GOTERM_BP_FAT	GO:0006779	porphyrin biosynthetic process	1.43623	0.0366244	FECH, HMBS, RSAD1	207	20	13528	9.8029	1	0.992961	46.4476
GOTERM_BP_FAT	GO:0033014	tetrapyrrole biosynthetic process	1.43623	0.0366244	FECH, HMBS, RSAD1	207	20	13528	9.8029	1	0.992961	46.4476
GOTERM_BP_FAT	GO:0045494	photoreceptor cell maintenance	1.39705	0.0400817	IQCB1, BBS4, CNGB1	207	21	13528	9.33609	1	0.993368	49.575
GOTERM_BP_FAT	GO:0006793	phosphorus metabolic process	1.39391	0.0403731	PDK2, PRKCZ, FGFR1, FGFR4, STK31, STK36, PTPRH, PNCK, DUSP10, TTK, WNK2, MAPK10, TYK2, STYK1, NTRK2, ROR2, DYRK4, FUK, PPM1M, STK19, IGFBP3, CTDP1, PIK3R4	207	973	13528	1.54482	1	0.990833	49.8305
GOTERM_BP_FAT	GO:0006796	phosphate metabolic process	1.39391	0.0403731	PDK2, PRKCZ, FGFR1, FGFR4, STK31, STK36, PTPRH, PNCK, DUSP10, TTK, WNK2, MAPK10, TYK2, STYK1, NTRK2, ROR2, DYRK4, FUK, PPM1M, STK19, IGFBP3, CTDP1, PIK3R4	207	973	13528	1.54482	1	0.990833	49.8305
GOTERM_BP_FAT	GO:0045930	negative regulation of mitotic cell cycle	1.35995	0.043657	SMAD3, APBB2, APBB1	207	22	13528	8.91173	1	0.991293	52.628
GOTERM_BP_FAT	GO:0048806	genitalia development	1.32472	0.047346	ASB1, ROR2, TP63	207	23	13528	8.52426	1	0.992031	55.5954
